# Supplementary material for: Incorporation characteristics of exogenous 15N-labeled thymidine, deoxyadenosine, deoxyguanosine and deoxycytidine into bacterial DNA
Source: PLOS journal article supplement (doi:10.1371/journal.pone.0229740), 2020-02-27
Supplement: S4 (10.1371/journal.pone.0229740.s004) [file journal.pone.0229740.s004]

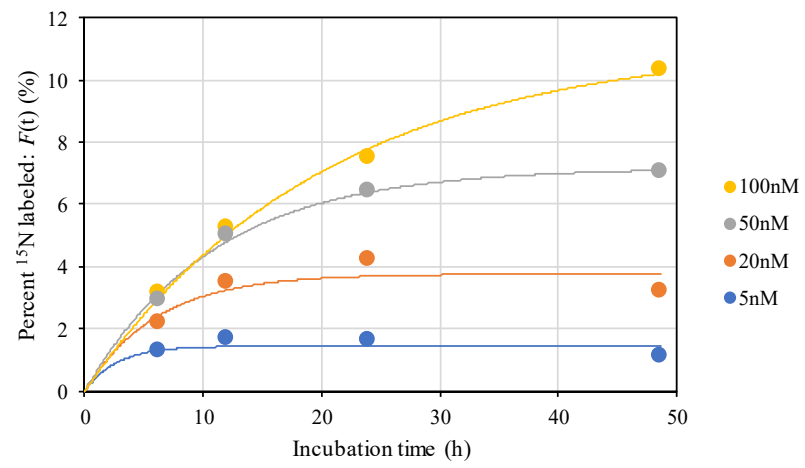

**S4 Fig. Time course of percent  $^{15}\text{N}$  labeled vs incubation time.**

The exponential curves ( $F(t) = F_L \times (1 - e^{-\mu t})$ ) were fitted by non-linear least squares regression. Data from Tsuchiya et al. 2015, Figure 4.
